# Supplementary material for: Soluble RANKL contributes to osteoclast formation in adult mice but not ovariectomy-induced bone loss
Source: PubMed Central journal article supplement (PMC6060116; doi:10.1038/s41467-018-05244-y), 2018-07-25
Supplement: 41467_2018_5244_MOESM1_ESM.pdf [file 41467_2018_5244_MOESM1_ESM.pdf]

# **Soluble RANKL contributes to osteoclast formation in adult mice but not ovariectomy-induced bone loss**

**Xiong et al**

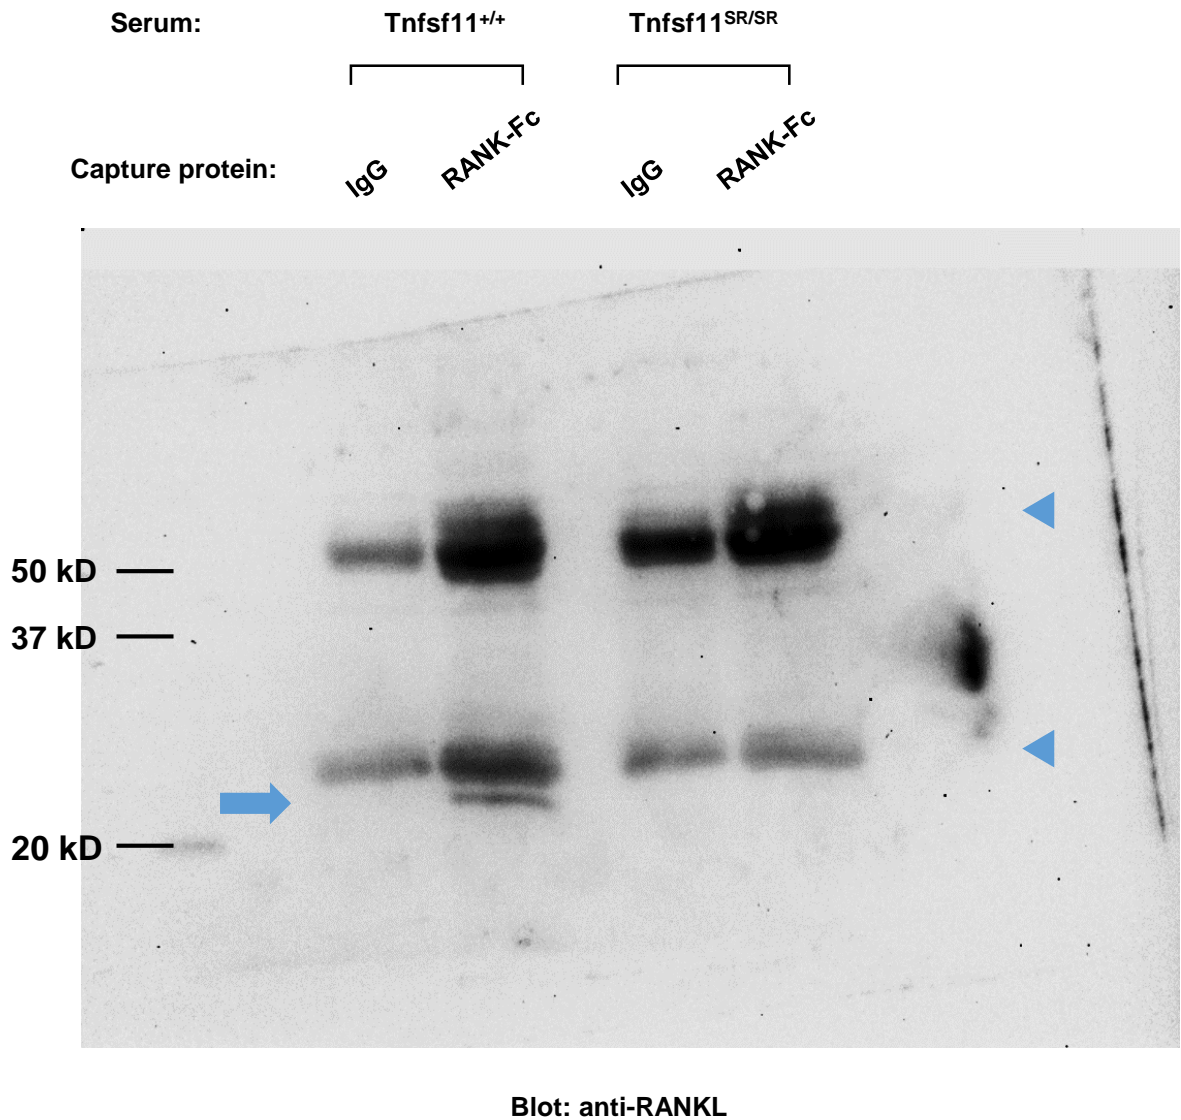

**Supplementary Figure 1.  $Tnfsf11^{SR/SR}$  mice lack sRANKL as measured by affinity isolation.** Analysis of sRANKL from the serum of  $Tnfsf11^{+/+}$  and  $Tnfsf11^{SR/SR}$  mice by affinity isolation and immunoblot. The arrow indicates the location of sRANKL and the arrowheads indicate the location of IgG heavy and light chains.

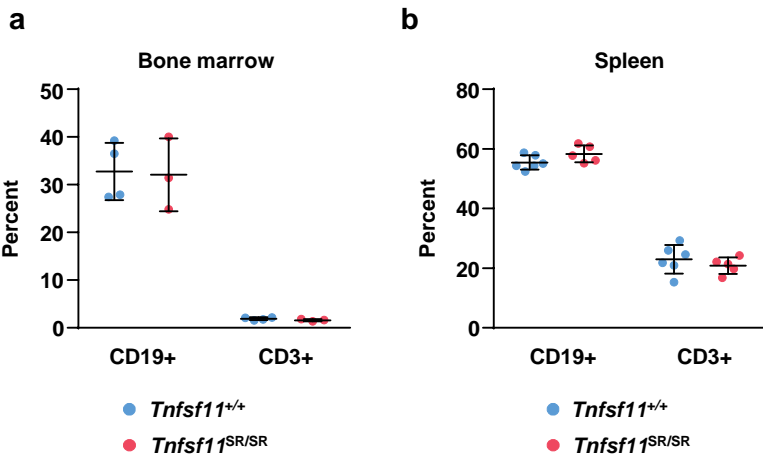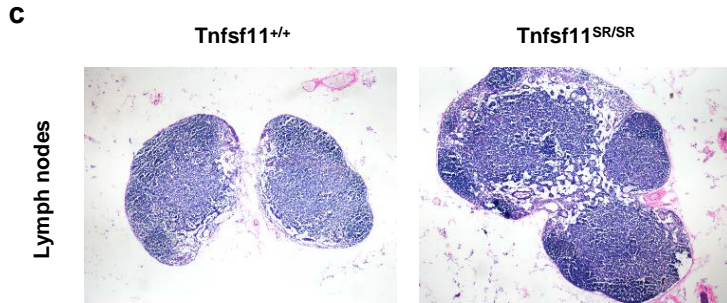

**Supplementary Figure 2. *Tnfsf11*<sup>SR/SR</sup> mice display normal lymphocyte and lymph node development.** (a) Quantification of B lymphocytes (CD19+) and T lymphocytes (CD3+) from bone marrow of *Tnfsf11*<sup>+/+</sup> ( $n = 4$ ) and *Tnfsf11*<sup>SR/SR</sup> ( $n = 3$ ) mice (values are mean  $\pm$  s.d.). (b) Quantification of B lymphocytes (CD19+) and T lymphocytes (CD3+) from the spleen of *Tnfsf11*<sup>+/+</sup> ( $n = 6$ ) and *Tnfsf11*<sup>SR/SR</sup> ( $n = 5$ ) mice (values are mean  $\pm$  s.d.). (c) Images of histological sections of inguinal lymph nodes from mice of the indicated genotypes.

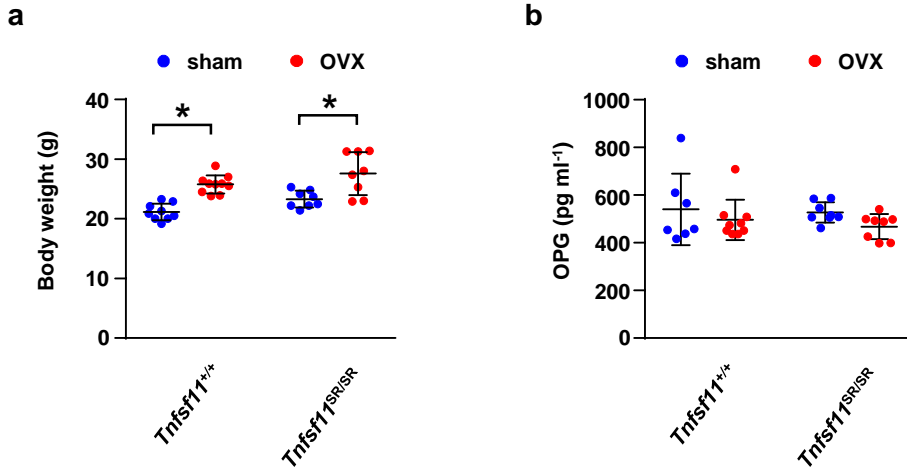

**Supplementary Figure 3. Body weight increases, but circulating OPG levels are unchanged, by ovariectomy in *Tnfsf11*<sup>+/+</sup> and *Tnfsf11*<sup>SR/SR</sup> mice.** Body weight (a), and OPG protein levels in the serum (b), of sham-operated (sham) and ovariectomized (ovx) *Tnfsf11*<sup>+/+</sup> ( $n = 7$  and  $9$  for sham and ovx, respectively) and *Tnfsf11*<sup>SR/SR</sup> ( $n = 8$  and  $8$  for sham and ovx, respectively). \* $P < 0.05$  using Student's t-test.

# Flow cytometry gating strategy

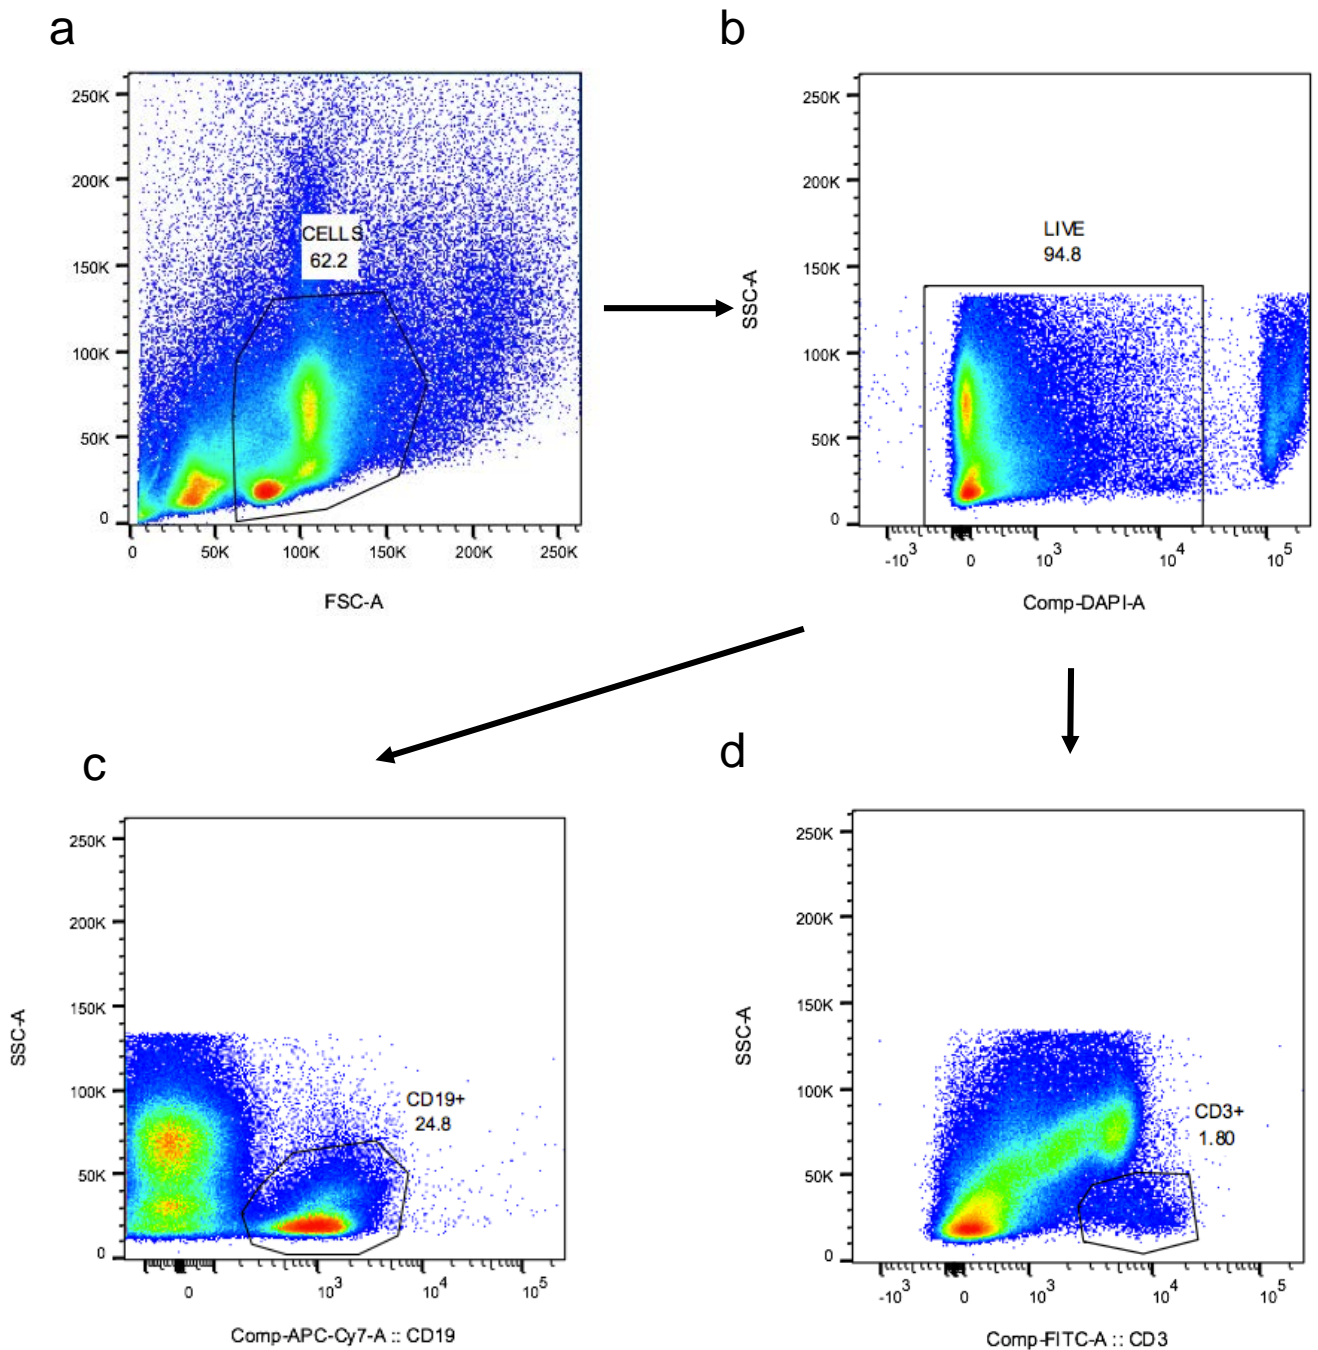

**Supplementary Figure 4. Representative gating strategy of a bone marrow sample.** Cells were gated on a forward scatter (FSC)/side scatter (SSC) plot (a), excluding cellular debris, and then live cells were selected by gating on the cells that excluded the viability dye (DAPI-negative) (b). B cells were recognized by gating on side scatter (SSC)/CD19-APC (c). T cells were recognized by gating on side scatter (SSC)/CD3-FITC (d). Percentages of sub-populations are shown for each graph.

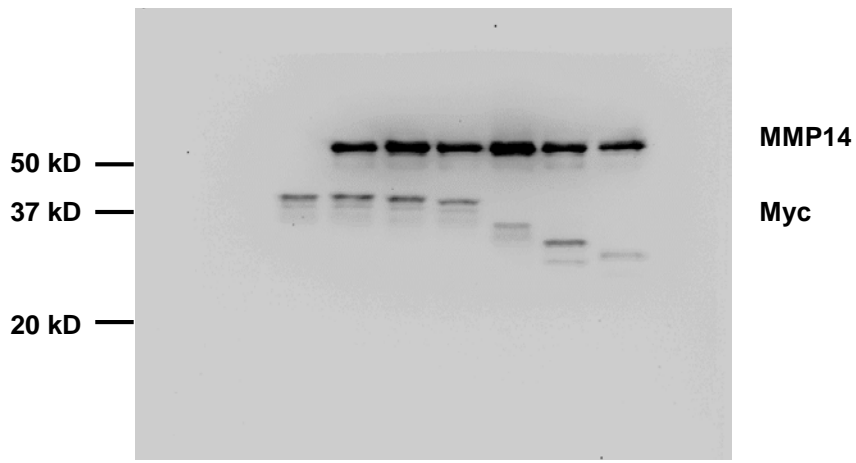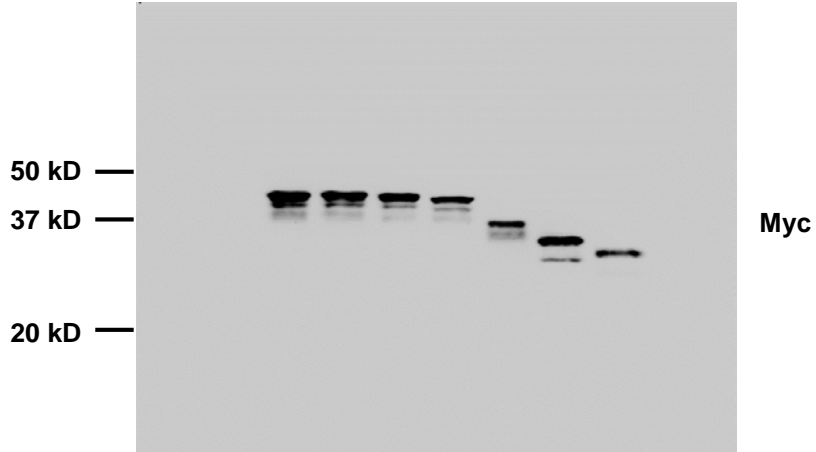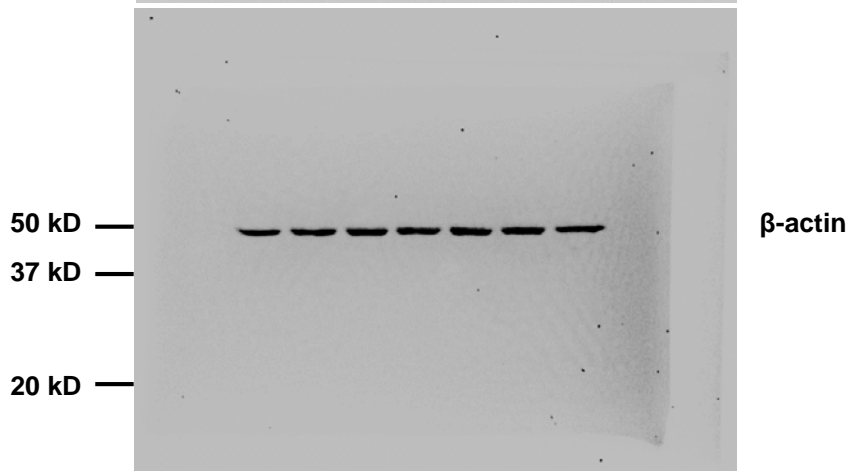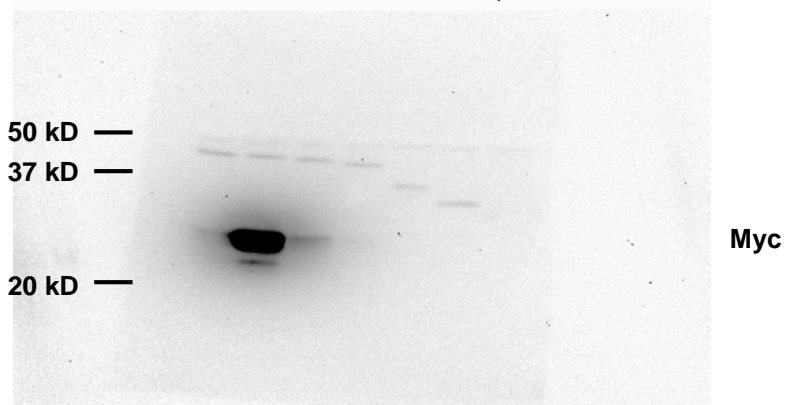

Supplementary Figure 5. Uncropped western bots used in Fig. 1b.

50 kD —  
37 kD —  
20 kD —

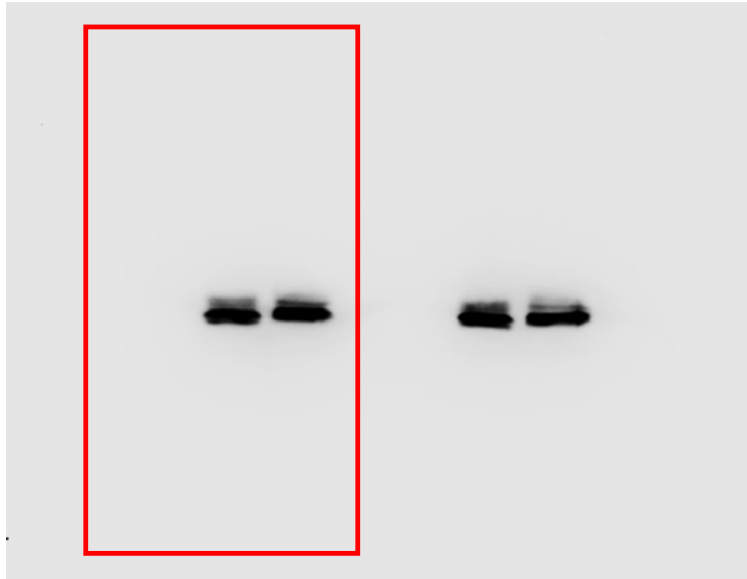

Myc

50 kD —  
37 kD —  
20 kD —

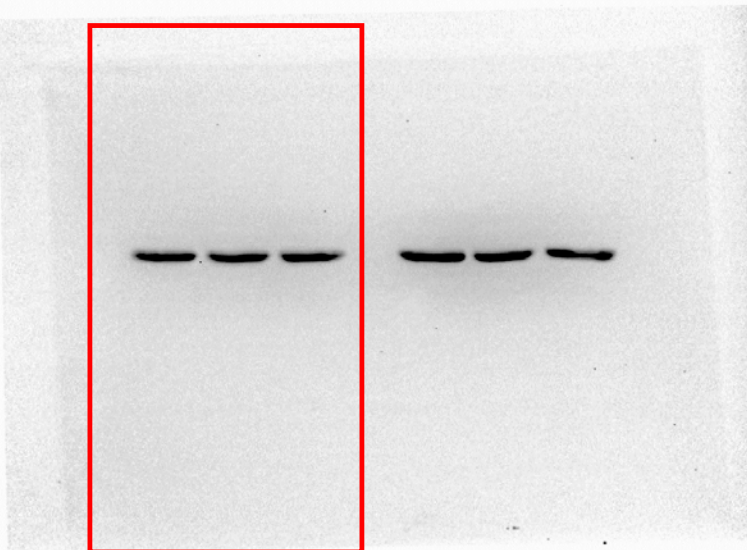

$\beta$ -actin

50 kD —  
37 kD —  
20 kD —

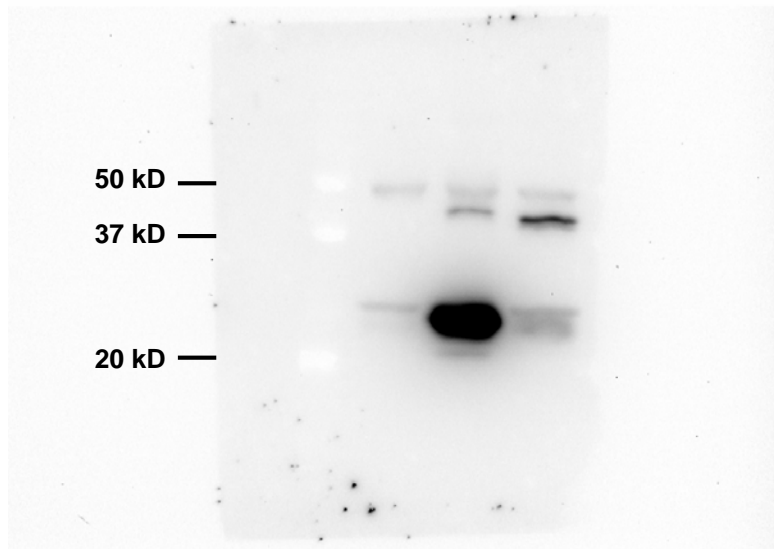

Myc

**Supplementary Figure 6. Uncropped western blots used in Fig. 1c.** Red box indicates the bands showed in Fig. 1c.

Supplementary Table 1

| Primer Sequences |                              |                                                                   |                   |
|------------------|------------------------------|-------------------------------------------------------------------|-------------------|
| No.              | Name                         | Sequence                                                          | Product Size (bp) |
| 1                | ex3OT1-for<br>ex3OT1-rev     | cagggatccCCCCTTTCTCCGTAAGAAGC<br>caggtcgacTGCATCATCATGGAACATCA    | 360               |
| 2                | ex3OT2-for<br>ex3OT2-rev     | cagggatccTGTCCCCACCATCCTTTAAT<br>caggtcgacTGGTAAGCCAGAAGGCTCAT    | 325               |
| 3                | ex3OT3-for<br>ex3OT3-rev     | CATGCTTCAGGGATCCTCAT<br>caggtcgacGGTTTGGTCCTCACTGGTCA             | 354               |
| 4                | ex3OT4-for<br>ex3OT4-rev     | cagggatccGGACATTTGGGACTGGGTAA<br>caggtcgacTTTTGAAGCCATTCTGACC     | 320               |
| 5                | ex3OT5-for<br>ex3OT5-rev     | cagggatccCCACAACCCCTTACAGGATG<br>caggtcgacAAGGAAAAGTAGCCCCAGGT    | 319               |
| 6                | ex3OT6-for<br>ex3OT6-rev     | cagggatccGCCACTGGCACTTATCAAAA<br>caggtcgacGCTCTGGAAAAATCTTGCTCAT  | 444               |
| 7                | ex4OT1-for<br>ex4OT1-rev     | cagggatccCTGACACAGAAGCGGCACTA<br>caggtcgacGGACTGCAGCTCTCAGCTCT    | 318               |
| 8                | ex4OT2-for<br>ex4OT2-rev     | cagggatccTTTTTCTTGGCCATTTTACA<br>caggtcgacGCAGATAATTAAGCCAGGCAAC  | 329               |
| 9                | ex4OT3-for<br>ex4OT3-rev     | cagggatccTTTGCCATAGACTGTTTTCTTG<br>caggtcgacCATCCCTCAGGAGCAAGTTC  | 323               |
| 10               | ex4OT4-for<br>ex4OT4-rev     | cagggatccTTTTCTTTGACCCAGTATTACCA<br>caggtcgacTCTGAGTTCCCTGCACAATG | 305               |
| 11               | ex4OT5-for<br>ex4OT5-rev     | cagggatccTTCCAAAAGGAGCCTTAAGAAG<br>caggtcgacCAGGCCAAAATGTCAAAAAGA | 402               |
| 12               | ex4OT6-for<br>ex4OT6-rev     | cagggatccGGGACATTTCTGAGGACACAA<br>caggtcgacAGCAGCACAGGGCATAGTG    | 349               |
| 13               | ex4OT1mu-for<br>ex4OT1mu-rev | CTGACACAGAAGCGGCACTA<br>CCTTTCATCCCATTTATGAGC                     | 160               |

Supplementary Table 2

| Summary of Off-target Cleavage |                          |                                |                           |                   |
|--------------------------------|--------------------------|--------------------------------|---------------------------|-------------------|
| Sites                          | Sequence                 | Indel Frequency (Mutant/Total) | Locus                     | Overlapping Genes |
| Exon 3 sgRNA                   | TCAGGAAGTCAACACATTGTGG   | 0/5                            | chr14:78284445-78284470   | No                |
| Ex3OT1                         | GCAGTAAATTCAACACATTGTGG  | 0/5                            | chr8:96842918-96842943    | No                |
| Ex3OT2                         | TGAGGAGCTGCAACACATTCTGG  | 0/5                            | chrX:59562222-59562247    | No                |
| Ex3OT3                         | TAAGGAAGTACAACACATAGTGG  | 0/5                            | chr14:13074161-13074186   | No                |
| Ex3OT4                         | TTACCACCTGCAACACATTGAAG  | 0/5                            | chr7:26571291-26571316    | Yes               |
| Ex3OT5                         | TCAAGAACAGAAACACATTGGGG  | 0/5                            | chrX:136094828-136094853  | No                |
| Ex3OT6                         | TAAAGCATTGCAACACATTGCAG  | 0/5                            | chr13:82396661-82396686   | No                |
| Exon 4 sgRNA                   | TATGATGGAAGGCTCATGGTTGG  | 0/5                            | chr14:78284312-78284337   | No                |
| Ex4OT1                         | TAAGAAGGAAGGCTCATGGTTGG  | 2/5                            | chr12:71247138-71247163   | No                |
| Ex4OT2                         | TCTGATGAAAGGCTCATGGAAAG  | 0/5                            | chr5:98995982-98996007    | No                |
| Ex4OT3                         | TCTGGTGGAAAGCCTCATGGTAGG | 0/5                            | chr14:35355852-35355877   | No                |
| Ex4OT4                         | TATGCTGGACAGCTCATGGTAGG  | 0/5                            | chr9:95577402-95577427    | No                |
| Ex4OT5                         | CATGTTGGAAGGCTCATGATCAG  | 0/5                            | chr14:102856819-102856844 | No                |
| Ex4OT6                         | TGTGAAGGAAAGCTCATGGTTAG  | 0/5                            | chr1:93292054-93292079    | No                |



Supplementary Table 3

| Sequences of cloned off-target PCR products |                                                                                                                                                                                                                                                                                                                                                 |                                                                                                                                                                                                                                                                                                                                    |
|---------------------------------------------|-------------------------------------------------------------------------------------------------------------------------------------------------------------------------------------------------------------------------------------------------------------------------------------------------------------------------------------------------|------------------------------------------------------------------------------------------------------------------------------------------------------------------------------------------------------------------------------------------------------------------------------------------------------------------------------------|
|                                             | Exon 3                                                                                                                                                                                                                                                                                                                                          | Exon 4                                                                                                                                                                                                                                                                                                                             |
| OT 1                                        | GAGACTGCAGTAAATTCAACACATTGTGGTTTGGGA<br>GAGACTGCAGTAAATTCAACACATTGTGGTTTGGGA<br>GAGACTGCAGTAAATTCAACACATTGTGGTTTGGGA<br>GAGACTGCAGTAAATTCAACACATTGTGGTTTGGGA<br>GAGACTGCAGTAAATTCAACACATTGTGGTTTGGGA<br>GAGACTGCAGTAAATTCAACACATTGTGGTTTGGGA<br>GAGACTGCAGTAAATTCAACACATTGTGGTTTGGGA<br>chr8:96842918-96842943 Overlapping Genes: None          | ACCAAGTAAGAAGGAAGGCTCATGGTTGGATGATG<br>ACCAAGTAAGAAGGAAGGCTCATGGTTGGATGATG<br>ACCAAGTAAGAAGGAAGGCTCATA-----A--ATG<br>ACCAAGTAAGAAGGAAGGCTCATGGTTGGATGATG<br>ACCAAGTAAGAAGGAAGGCTCATGGTTGGATGATG<br>ACCAAGTAAGAAGGAAGGCTCATGGTTGGATGATG<br>ACCAAGTAAGAAGGAAGGCTCATA-----A--ATG<br>chr12:71247130-71247172 Overlapping Genes: None   |
| OT 2                                        | TATATTTGAGGAGCTGCAACACATTCTGGTTGTTC<br>TATATTTGAGGAGCTGCAACACATTCTGGTTGTTC<br>TATATTTGAGGAGCTGCAACACATTCTGGTTGTTC<br>TATATTTGAGGAGCTGCAACACATTCTGGTTGTTC<br>TATATTTGAGGAGCTGCAACACATTCTGGTTGTTC<br>TATATTTGAGGAGCTGCAACACATTCTGGTTGTTC<br>TATATTTGAGGAGCTGCAACACATTCTGGTTGTTC<br>chrX:59562222-59562247 Overlapping Genes: None                 | AGTGACTCTGATGAAAGGCTCATGGAAAGAAGAGG<br>AGTGACTCTGATGAAAGGCTCATGGAAAGAAGAGG<br>AGTGACTCTGATGAAAGGCTCATGGAAAGAAGAGG<br>AGTGACTCTGATGAAAGGCTCATGGAAAGAAGAGG<br>AGTGACTCTGATGAAAGGCTCATGGAAAGAAGAGG<br>AGTGACTCTGATGAAAGGCTCATGGAAAGAAGAGG<br>AGTGACTCTGATGAAAGGCTCATGGAAAGAAGAGG<br>chr5:98995982-98996007 Overlapping Genes: None    |
| OT 3                                        | TTGTGATAAGGAACTACAACACATAGTGGATCACG<br>TTGTGATAAGGAACTACAACACATAGTGGATCACG<br>TTGTGATAAGGAACTACAACACATAGTGGATCAGCG<br>TTGTGATAAGGAACTACAACACATAGTGGATCACG<br>TTGTGATAAGGAACTACAACACATAGCGGATCACG<br>TTGTGATAAGGAACTACAACACATAGTGGATCACG<br>TTGTGATAAGGAACTACAACACATAGTGGATCACG<br>chr14:13074161-13074186 Overlapping Genes: None               | GTAGTTTCTGGTGAAGCCTCATGGTAGGTAGCAT<br>GTAGTTTCTGGTGAAGCCTCATGGTAGGTAGCAT<br>GTAGTTTCTGGTGAAGCCTCATGGTAGGTAGCAT<br>GTAGTTTCTGGTGAAGCCTCATGGTAGGTAGCAT<br>GTAGTTTCTGGTGAAGCCTCATGGTAGGTAGCAT<br>GTAGTTTCTGGTGAAGCCTCATGGTAGGTAGCAT<br>GTAGTTTCTGGTGAAGCCTCATGGTAGGTAGCAT<br>chr14:35355852-35355877 Overlapping Genes: None          |
| OT 4                                        | TGGTTCCTTACCACCTGCAACACATTGAAGAGCTTA<br>TGGTTCCTTACCACCTGCAACACATTGAAGAGCTTA<br>TGGTTCCTTACCACCTGCAACACATTGAAGAGCTTA<br>TGGTTCCTTACCACCTGCAACACATTGAAGAGCTTA<br>TGGTTCCTTACCACCTGCAACACATTGAAGAGCTTA<br>TGGTTCCTTACCACCTGCAACACATTGAAGAGCTTA<br>TGGTTCCTTACCACCTGCAACACATTGAAGAGCTTA<br>chr7:26571291-26571316 Overlapping Genes: Yes           | TGCCTATATGCTGGACAGCTCATGGTAGGTGTTCT<br>TGCCTATATGCTGGACAGCTCATGGTAGGTGTTCT<br>TGCCTATATGCTGGACAGCTCATGGTAGGTGTTCT<br>TGCCTATATGCTGGACAGCTCATGGTAGGTGTTCT<br>TGCCTATATGCTGGACAGCTCATGGTAGGTGTTCT<br>TGCCTATATGCTGGACAGCTCATGGTAGGTGTTCT<br>TGCCTATATGCTGGACAGCTCATGGTAGGTGTTCT<br>chr9:95577402-95577427 Overlapping Genes: None    |
| OT 5                                        | ATTTTCGTC AAGAACAGAAACACATTGGGGAACATA<br>ATTTTCGTC AAGAACAGAAACACATTGGGGAACATA<br>ATTTTCGTC AAGAACAGAAACACATTGGGGAACATA<br>ATTTTCGTC AAGAACAGAAACACATTGGGGAACATA<br>ATTTTCGTC AAGAACAGAAACACATTGGGGAACATA<br>ATTTTCGTC AAGAACAGAAACACATTGGGGAACATA<br>ATTTTCGTC AAGAACAGAAACACATTGGGGAACATA<br>chrX:136094828-136094853 Overlapping Genes: None | ACTCGACATGTTGGAAGGCTCATGATCAGCTCCTC<br>ACTCGACATGTTGGAAGGCTCATGATCAGCTCCTC<br>ACTCGACATGTTGGAAGGCTCATGATCAGCTCCTC<br>ACTCGACATGTTGGAAGGCTCATGATCAGCTCCTC<br>ACTCGACATGTTGGAAGGCTCATGATCAGCTCCTC<br>ACTCGACATGTTGGAAGGCTCATGATCAGCTCCTC<br>ACTCGACATGTTGGAAGGCTCATGATCAGCTCCTC<br>chr14:102856819-102856844 Overlapping Genes: None |
| OT 6                                        | TGATAATAAAGCATTGCAACACATTGCAGCTCTAT<br>TGATAATAAAGCATTGCAACACATTGCAGCTCTAT<br>TGATAATAAAGCATTGCAACACATTGCAGCTCTAT<br>TGATAATAAAGCATTGCAACACATTGCAGCTCTAT<br>TGATAATAAAGCATTGCAACACATTGCAGCTCTAT<br>TGATAATAAAGCATTGCAACACATTGCAGCTCTAT<br>TGATAATAAAGCATTGCAACACATTGCAGCTCTAT<br>chr13:82396661-82396686 Overlapping Genes: None                | ACACAATGTGAAGGAAAGCTCATGGTTAGCGGTTT<br>ACACAATGTGAAGGAAAGCTCATGGTTAGCGGTTT<br>ACACAATGTGAAGGAAAGCTCATGGTTAGCGGTTT<br>ACACAATGTGAAGGAAAGCTCATGGTTAGCGGTTT<br>ACACAATGTGAAGGAAAGCTCATGGTTAGCGGTTT<br>ACACAATGTGAAGGAAAGCTCATGGTTAGCGGTTT<br>ACACAATGTGAAGGAAAGCTCATGGTTAGCGGTTT<br>chr1:93292054-93292079 Overlapping Genes: None    |

\*Dashes (-) represent deleted bases
